# Supplementary material for: Antibiotic Prophylaxis or Granulocyte-Colony Stimulating Factor Support in Multiple Myeloma Patients Undergoing Autologous Stem Cell Transplantation
Source: MDPI journal article supplement (doi:10.3390/cancers13143439), 2021-07-09
Supplement: s1 [file s1]

**Table S1.** Patients' characteristics at diagnosis.

| Variable                                | <i>n</i> ( <i>n</i> = 298) | %    |
|-----------------------------------------|----------------------------|------|
| Age ( <i>n</i> = 256)                   |                            |      |
| Median (range)                          | 58 (51–63) years           |      |
| Sex ( <i>n</i> = 298)                   |                            |      |
| Female                                  | 125                        | 42.0 |
| Male                                    | 173                        | 58.0 |
| Heavy chain isotype ( <i>n</i> = 263)   |                            |      |
| IgG                                     | 153                        | 58.2 |
| IgA                                     | 56                         | 21.3 |
| Bence-Jones                             | 43                         | 16.3 |
| Other                                   | 11                         | 4.2  |
| Light chain isotype ( <i>n</i> = 263)   |                            |      |
| Kappa                                   | 167                        | 63.5 |
| Lambda                                  | 95                         | 36.1 |
| Other                                   | 1                          | 0.4  |
| Calcium elevation ( <i>n</i> = 212)     |                            |      |
| Yes                                     | 29                         | 13.7 |
| No                                      | 183                        | 86.3 |
| Renal insufficiency ( <i>n</i> = 222)   |                            |      |
| Yes                                     | 31                         | 14.0 |
| No                                      | 191                        | 86.0 |
| Anemia ( <i>n</i> = 225)                |                            |      |
| Yes                                     | 75                         | 33.3 |
| No                                      | 150                        | 66.7 |
| Bone lesions ( <i>n</i> = 255)          |                            |      |
| Yes                                     | 217                        | 85.1 |
| No                                      | 38                         | 14.9 |
| ISS ( <i>n</i> = 165)                   |                            |      |
| I                                       | 77                         | 46.7 |
| II                                      | 45                         | 27.3 |
| III                                     | 43                         | 26.0 |
| Adverse cytogenetics* ( <i>n</i> = 188) |                            |      |
| Yes                                     | 58                         | 30.9 |
| No                                      | 130                        | 69.1 |

Abbreviations: ISS, International Staging System. \* Deletion 17p13, translocation 4; 14 or gain of 1q21 more than three copies.

**Table S2.** Multivariable mixed effects model on the impact of the anti-infective strategy on the time from platelets < 20/nl to ≥ 20/nl.

| Variable                                    | Time to Platelets ≥ 20/nl |                 |
|---------------------------------------------|---------------------------|-----------------|
|                                             | HR (95% CI)               | <i>p</i> -value |
| G-CSF support (vs. antibiotic prophylaxis)  | 0.86 (0.67–1.09)          | 0.20            |
| No prophylaxis (vs. antibiotic prophylaxis) | 1.12 (0.81–1.55)          | 0.50            |
| Age (per ten years)                         | 1.00 (0.87–1.16)          | 0.97            |
| ASCT at relapse (vs. first-line treatment)  | 0.71 (0.53–0.94)          | 0.02            |
| ≥ VGPR before ASCT (vs. ≤ PR)               | 0.94 (0.75–1.17)          | 0.57            |
| Stem cell amount ≥ 2.5* (vs. < 2.5)         | 1.38 (1.04–1.82)          | 0.03            |

Abbreviations: ASCT, autologous stem cell transplantation; CI, confidence interval; G-CSF, granulocyte-colony stimulating factor; HR, Hazard Ratio; PR, partial remission; VGPR, very good partial remission; \*  $\geq 2.5 \times 10^6$  CD34+ cells per kg of body weight.

**Table S3.** Multivariable mixed effects model on the impact of the anti-infective strategy on the total duration of inpatient stay.

| Variable                                    | Total duration of inpatient stay |         |
|---------------------------------------------|----------------------------------|---------|
|                                             | Estimate (95% CI)                | p-value |
| G-CSF support (vs. antibiotic prophylaxis)  | −0.17 (−0.24—0.10)               | <0.001  |
| No prophylaxis (vs. antibiotic prophylaxis) | 0.08 (−0.02–0.17)                | 0.11    |
| Age (per ten years)                         | 0.01 (0.00–0.01)                 | <0.001  |
| ASCT at relapse (vs. first-line treatment)  | 0.06 (−0.03–0.14)                | 0.18    |
| ≥ VGPR before ASCT (vs. ≤ PR)               | 0.05 (−0.02–0.12)                | 0.15    |
| Stem cell amount $\geq 2.5^*$ (vs. < 2.5)   | −0.06 (−0.14–0.02)               | 0.16    |

Abbreviations: ASCT, autologous stem cell transplantation; CI, confidence interval; G-CSF, granulocyte-colony stimulating factor; PR, partial remission; VGPR, very good partial remission; \*  $\geq 2.5 \times 10^6$  CD34+ cells per kg of body weight.
